# Supplementary material
Source: PubMed Central journal article supplement (PMC5710181)
Supplement: jamaneurol-74-1097-s001.pdf [file jamaneurol-74-1097-s001.pdf]

## Supplementary Online Content

Chiò A, Mora G, Moglia C, et al. Secular trends of amyotrophic lateral sclerosis: the Piemonte and Valle D'Aosta Register. *JAMA Neurol*. Published online July 10, 2017.  
doi:10.1001/jamaneurol.2017.1387

**eFigure 1.** Trend of Mean Age at Onset Compared to the Mean Age of the Piemonte and Valle d'Aosta Population, 1995-2014, Males

**eFigure 2.** Trend of Mean Age at Onset Compared to the Mean Age of the Piemonte and Valle d'Aosta Population, 1995-2014, Females

**eFigure 3.** Progressive Decline of Men to Women Rate Ratio During the 20 Years of the Study.

**eTable 1.** Frequency of El Escorial Criteria Revised Levels of Diagnosis, 1995-2004 vs 2005-2014

**eTable 2.** Site of Onset of ALS Cases According to Sex, 1995-2004 vs 2005-2014

**eTable 3.** Age-Period-Cohort Rates and Relative Risks (RRs)

**eTable 4.** Case Ascertainment by Year Using Two Source Capture-Recapture Methods, Piemonte and Valle d'Aosta Register for ALS, 1994-2004

This supplementary material has been provided by the authors to give readers additional information about their work.

**eFigure 1.** Trend of Mean Age at Onset Compared to the Mean Age of the Piemonte and Valle d’Aosta Population, 1995-2014, Males

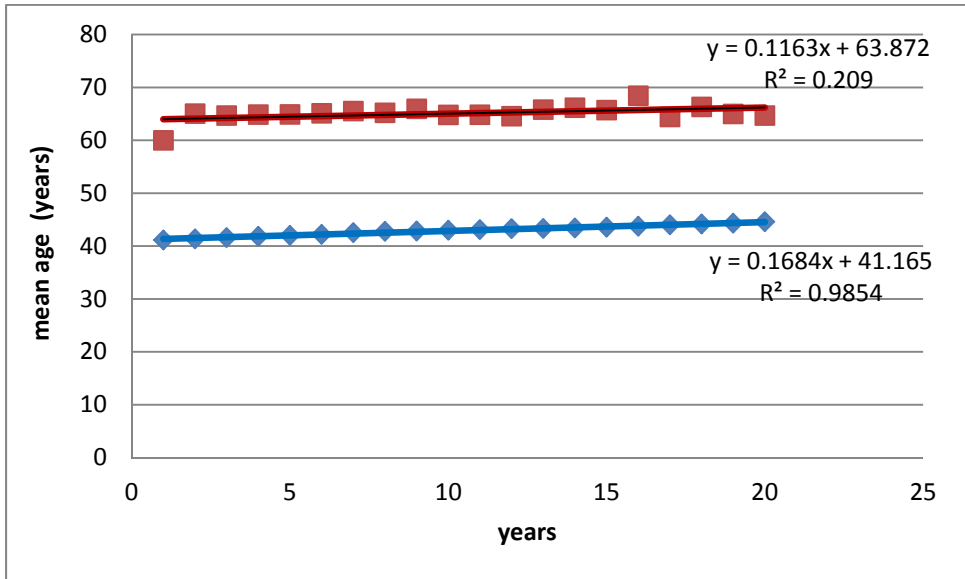

The linear regression is shown. The two trends are significantly correlated (Pearson’s correlation coefficient 0.504,  $p=0.024$ ). Read: mean age at onset of ALS; Blue, mean age of the Piemonte and Valle d’Aosta population

**eFigure 2.** Trend of Mean Age at Onset Compared to the Mean Age of the Piemonte and Valle d’Aosta Population, 1995-2014, Females

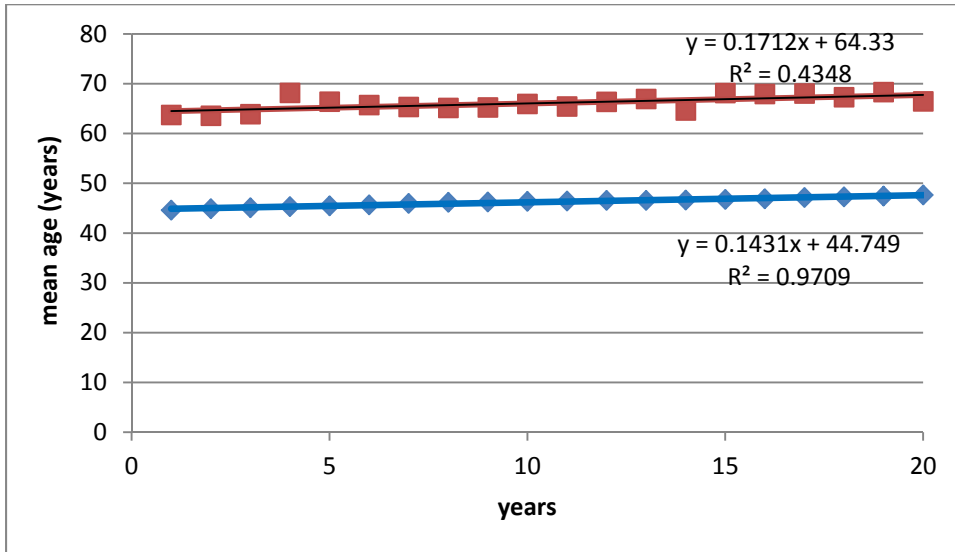

The linear regression is shown. The two trends are significantly correlated (Pearson’s correlation coefficient 0.504,  $p=0.002$ ). Read: mean age at onset of ALS; Blue, mean age of the Piemonte and Valle d’Aosta population

**eFigure 3.** Progressive Decline of Men to Women Rate Ratio During the 20 Years of the Study.

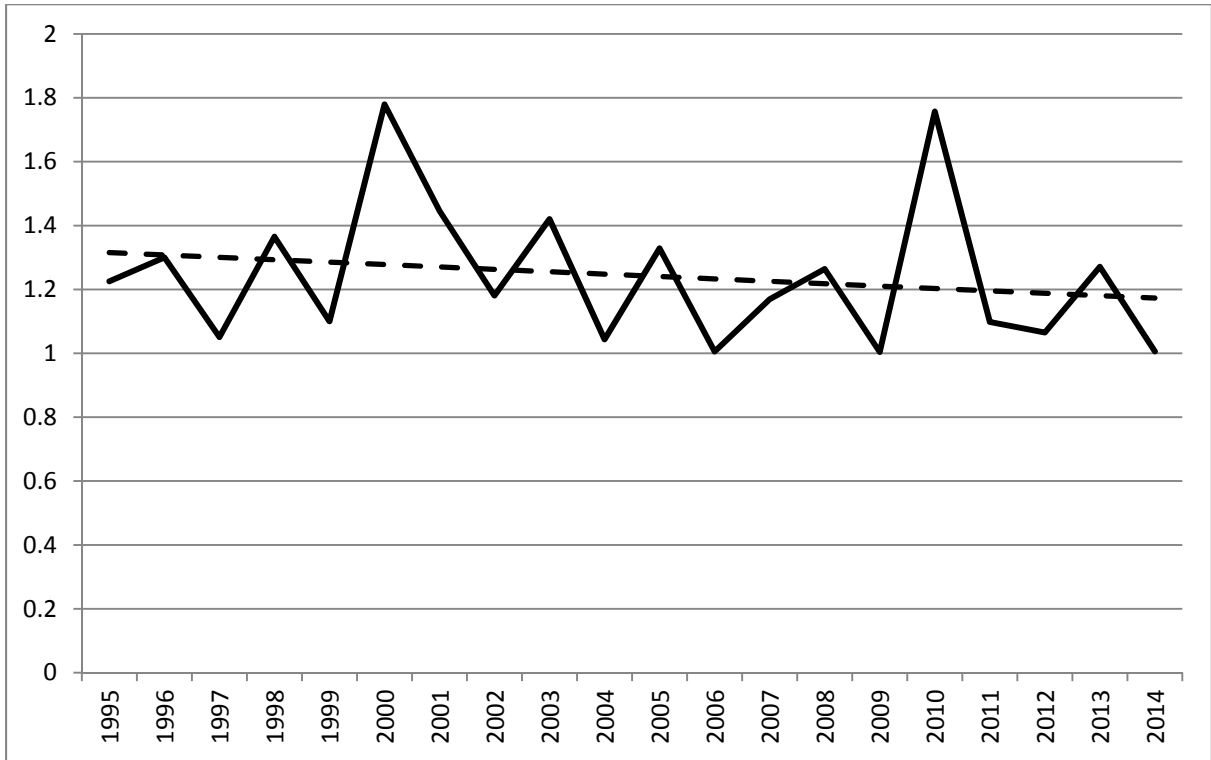

Data are based on age-adjusted incidence rates. The dotted line represents the linear regression.

**eTable 1.** Frequency of El Escorial Criteria Revised Levels of Diagnosis, 1995-2004 vs 2005-2014

| <b>El Escorial revised level</b>     | <b>1995-2004</b> | <b>2005-2014</b> |
|--------------------------------------|------------------|------------------|
| Definite                             | 618 (49.7%)      | 687 (47.1%)      |
| Probable                             | 398 (32.0%)      | 446 (30.6%)      |
| Probable - Laboratory<br>Supported * | 59 (4.7%)        | 83 (5.7%)        |
| Possible                             | 120 (9.7%)       | 178 (12.2%)      |
| Suspected                            | 48 (3.9%)        | 65 (4.4%)        |
| Overall                              | 1243             | 1459             |

\* ALS cases diagnosed before 2000 were re-classified according to the El Escorial

Criteria revised

**eTable 2.** Site of Onset of ALS Cases According to Sex, 1995-2004 vs 2005-2014

|        | 1995-2004      |                | 2005-2014      |             | p value * |        |
|--------|----------------|----------------|----------------|-------------|-----------|--------|
|        | Male           | Female         | Male           | Female      | Male      | Female |
| Bulbar | 219<br>(32.3%) | 246<br>(43.5%) | 213<br>(27.4%) | 294 (43.2%) | 0.05      | 0.94   |
| Spinal | 459<br>(67.7%) | 319<br>(56.5%) | 565<br>(72.6%) | 387 (56.8%) |           |        |

\*Comparison between 1995-2004 and 2005-2014 periods for each gender

**eTable 3.** Age-Period-Cohort Rates and Relative Risks (RRs)

| <b>TOTAL</b>  |             |             |              |
|---------------|-------------|-------------|--------------|
| <b>Age</b>    | <b>Rate</b> | <b>2.5%</b> | <b>97.5%</b> |
| 40            | 8.57821E-06 | 6.27734E-06 | 1.17224E-05  |
| 45            | 1.47701E-05 | 1.17923E-05 | 1.84999E-05  |
| 50            | 2.54314E-05 | 2.17917E-05 | 2.9679E-05   |
| 55            | 4.30422E-05 | 3.80598E-05 | 4.86767E-05  |
| 60            | 6.57116E-05 | 5.97517E-05 | 7.22661E-05  |
| 65            | 8.83721E-05 | 8.06833E-05 | 9.67937E-05  |
| 70            | 0.000114501 | 0.000105812 | 0.000123903  |
| 75            | 9.65964E-05 | 8.92904E-05 | 0.0001045    |
| 80            | 7.26953E-05 | 6.3838E-05  | 8.27815E-05  |
| 85            | 5.47081E-05 | 4.42927E-05 | 6.75726E-05  |
| <b>Period</b> | <b>RR</b>   | <b>2.5%</b> | <b>97.5%</b> |
| 1995          | 1.0262124   | 0.9800675   | 1.07453      |
| 2000          | 0.977959    | 0.9155164   | 1.04466      |
| 2005          | 0.9732843   | 0.9129617   | 1.037593     |
| 2010          | 1.0225646   | 0.9847657   | 1.061814     |
| <b>Cohort</b> | <b>RR</b>   | <b>2.5%</b> | <b>97.5%</b> |
| 1910          | 0.6894939   | 0.5072607   | 0.9371942    |
| 1915          | 0.7556151   | 0.6075019   | 0.9398392    |
| 1920          | 0.8280771   | 0.7232734   | 0.9480671    |
| 1925          | 0.9074882   | 0.8380418   | 0.9826894    |
| 1930          | 0.9920089   | 0.9186836   | 1.0711868    |
| 1935          | 1.0599011   | 0.9919121   | 1.1325504    |
| 1940          | 1.0694754   | 0.9997358   | 1.1440798    |
| 1945          | 1.0558446   | 0.9576561   | 1.1641003    |
| 1950          | 1.0645744   | 0.9425007   | 1.2024592    |
| 1955          | 1.0911962   | 0.9330209   | 1.2761871    |
| 1960          | 1.1215573   | 0.8985478   | 1.3999154    |
| 1965          | 1.1527632   | 0.8543439   | 1.5554195    |
| 1970          | 1.1848374   | 0.8082156   | 1.7369619    |

| <b>MEN</b> |             |             |              |
|------------|-------------|-------------|--------------|
| <b>Age</b> | <b>Rate</b> | <b>2.5%</b> | <b>97.5%</b> |
| 40         | 1.01605E-05 | 6.92148E-06 | 1.49154E-05  |
| 45         | 1.77709E-05 | 1.36339E-05 | 2.31633E-05  |
| 50         | 3.10816E-05 | 2.62461E-05 | 3.6808E-05   |
| 55         | 5.3108E-05  | 4.62784E-05 | 6.09453E-05  |

|               |             |             |              |
|---------------|-------------|-------------|--------------|
| <b>60</b>     | 7.88837E-05 | 7.04041E-05 | 8.83845E-05  |
| <b>65</b>     | 0.000101693 | 8.9427E-05  | 0.000115642  |
| <b>70</b>     | 0.000142993 | 0.000126016 | 0.000162258  |
| <b>75</b>     | 0.00012289  | 0.000106831 | 0.000141363  |
| <b>80</b>     | 9.1798E-05  | 7.40279E-05 | 0.000113834  |
| <b>85</b>     | 6.85725E-05 | 4.93579E-05 | 9.5267E-05   |
|               |             |             |              |
| <b>Period</b> | <b>RR</b>   | <b>2.5%</b> | <b>97.5%</b> |
| <b>1995</b>   | 0.9963126   | 0.9338292   | 1.062977     |
| <b>2000</b>   | 1.0304725   | 0.9446551   | 1.124086     |
| <b>2005</b>   | 0.9514593   | 0.8705513   | 1.039887     |
| <b>2010</b>   | 1.0205312   | 0.9697239   | 1.074001     |
|               |             |             |              |
| <b>Cohort</b> | <b>RR</b>   | <b>2.5%</b> | <b>97.5%</b> |
| <b>1910</b>   | 0.8381515   | 0.5350442   | 1.312972     |
| <b>1915</b>   | 0.8684242   | 0.622981    | 1.210567     |
| <b>1920</b>   | 0.8997902   | 0.7189384   | 1.126136     |
| <b>1925</b>   | 0.9322892   | 0.8051002   | 1.079571     |
| <b>1930</b>   | 0.9672985   | 0.849627    | 1.101267     |
| <b>1935</b>   | 1.0051212   | 0.9139509   | 1.105386     |
| <b>1940</b>   | 1.0194195   | 0.9208907   | 1.12849      |
| <b>1945</b>   | 0.9998173   | 0.8971033   | 1.114292     |
| <b>1950</b>   | 1.0084918   | 0.8795429   | 1.156346     |
| <b>1955</b>   | 1.0430031   | 0.8816904   | 1.233829     |
| <b>1960</b>   | 1.083201    | 0.8388689   | 1.398698     |
| <b>1965</b>   | 1.1249483   | 0.7810477   | 1.620271     |
| <b>1970</b>   | 1.1683044   | 0.7220531   | 1.890353     |

| <b>WOMEN</b>  |             |             |              |  |
|---------------|-------------|-------------|--------------|--|
|               |             |             |              |  |
| <b>Age</b>    | <b>Rate</b> | <b>2.5%</b> | <b>97.5%</b> |  |
| <b>40</b>     | 7.24184E-06 | 4.50588E-06 | 1.16391E-05  |  |
| <b>45</b>     | 1.23191E-05 | 8.75718E-06 | 1.73299E-05  |  |
| <b>50</b>     | 2.09562E-05 | 1.66171E-05 | 2.64283E-05  |  |
| <b>55</b>     | 3.52779E-05 | 2.93973E-05 | 4.23347E-05  |  |
| <b>60</b>     | 5.57757E-05 | 4.84354E-05 | 6.42283E-05  |  |
| <b>65</b>     | 7.8507E-05  | 6.89694E-05 | 8.93635E-05  |  |
| <b>70</b>     | 9.33303E-05 | 8.38903E-05 | 0.000103833  |  |
| <b>75</b>     | 8.30378E-05 | 7.33641E-05 | 9.39871E-05  |  |
| <b>80</b>     | 6.18055E-05 | 5.15767E-05 | 7.4063E-05   |  |
| <b>85</b>     | 4.46541E-05 | 3.26175E-05 | 6.11325E-05  |  |
|               |             |             |              |  |
| <b>Period</b> | <b>RR</b>   | <b>2.5%</b> | <b>97.5%</b> |  |
| <b>1995</b>   | 1.0563313   | 0.989605    | 1.127557     |  |



|               |           |             |              |  |
|---------------|-----------|-------------|--------------|--|
| <b>2000</b>   | 0.9186126 | 0.8302646   | 1.016362     |  |
| <b>2005</b>   | 0.999419  | 0.911395    | 1.095944     |  |
| <b>2010</b>   | 1.0225813 | 0.9670544   | 1.081297     |  |
|               |           |             |              |  |
| <b>Cohort</b> | <b>RR</b> | <b>2.5%</b> | <b>97.5%</b> |  |
| <b>1910</b>   | 0.6217821 | 0.4045547   | 0.9556508    |  |
| <b>1915</b>   | 0.6982723 | 0.5143956   | 0.9478777    |  |
| <b>1920</b>   | 0.784172  | 0.6482287   | 0.9486247    |  |
| <b>1925</b>   | 0.880639  | 0.7848339   | 0.9881391    |  |
| <b>1930</b>   | 0.986919  | 0.8825682   | 1.1036076    |  |
| <b>1935</b>   | 1.079626  | 0.9784231   | 1.1912969    |  |
| <b>1940</b>   | 1.1001848 | 0.9961025   | 1.2151427    |  |
| <b>1945</b>   | 1.0849129 | 0.9395811   | 1.2527241    |  |
| <b>1950</b>   | 1.0877061 | 0.909024    | 1.3015109    |  |
| <b>1955</b>   | 1.1066358 | 0.8753174   | 1.3990843    |  |
| <b>1960</b>   | 1.1286535 | 0.8066084   | 1.5792777    |  |
| <b>1965</b>   | 1.1511092 | 0.7294861   | 1.816419     |  |
| <b>1970</b>   | 1.1740117 | 0.6549537   | 2.1044287    |  |

**eTable 4.** Case Ascertainment by Year Using Two Source Capture-Recapture Methods, Piemonte and Valle d’Aosta Register for ALS, 1994-2004

| Year             | Observed    | Unobserved* | Coverage (%) § | Crude incidence # | Corrected crude incidence (95% c.i.) ** |
|------------------|-------------|-------------|----------------|-------------------|-----------------------------------------|
| 1995             | 114         | 3           | 97.7           | 2.59              | 2.65 (2.20-3.20)                        |
| 1996             | 105         | 2           | 98.3           | 2.38              | 2.42 (1.99-2.95)                        |
| 1997             | 129         | 3           | 98.2           | 2.92              | 2.98 (2.50-3.55)                        |
| 1998             | 134         | 2           | 98.6           | 3.04              | 3.09 (2.60-3.67)                        |
| 1999             | 127         | 2           | 98.3           | 2.88              | 2.93 (2.45-3.50)                        |
| 2000             | 126         | 2           | 98.7           | 2.86              | 2.90 (2.43-3.45)                        |
| 2001             | 144         | 4           | 97.2           | 3.32              | 3.42 (2.90-4.03)                        |
| 2002             | 131         | 5           | 96.5           | 3.01              | 3.12 (2.63-3.70)                        |
| 2003             | 112         | 2           | 98.2           | 2.55              | 2.60 (2.16-3.14)                        |
| 2004             | 121         | 1           | 98.8           | 2.72              | 2.81 (2.34-3.37)                        |
| <b>1995-2004</b> | <b>1243</b> | <b>26</b>   | <b>98.0</b>    | <b>2.89</b>       | <b>2.95 (2.77-3.14)</b>                 |
| 2005             | 146         | 4           | 96.9           | 3.27              | 3.36 (2.85-3.95)                        |
| 2006             | 137         | 2           | 98.3           | 3.06              | 3.11 (2.62-3.68)                        |
| 2007             | 153         | 4           | 97.3           | 3.41              | 3.50 (2.98-4.11)                        |
| 2008             | 107         | 2           | 98.1           | 3.35              | 2.39 (1.97-2.89)                        |
| 2009             | 146         | 5           | 96.7           | 3.20              | 3.31 (2.81-3.89)                        |
| 2010             | 144         | 3           | 98.1           | 3.15              | 3.21 (2.72-3.77)                        |

|                       |             |           |             |             |                         |
|-----------------------|-------------|-----------|-------------|-------------|-------------------------|
| 2011                  | 160         | 4         | 97.6        | 3.57        | 3.66 (3.13-4.27)        |
| 2012                  | 170         | 4         | 97.6        | 3.78        | 3.87 (3.32-4.50)        |
| 2013                  | 141         | 2         | 98.5        | 3.09        | 3.14 (2.66-3.71)        |
| 2014                  | 154         | 5         | 97.0        | 3.39        | 3.50 (2.99-4.10)        |
| <b>2005-<br/>2014</b> | <b>1459</b> | <b>35</b> | <b>97.6</b> | <b>3.23</b> | <b>3.31 (3.11-3.52)</b> |

Incidence is reported per 100,000 population. 95% c.i. = 95% confidence interval.

\* Maximum likelihood estimator = (cases unique to source x cases not present in source)/cases common to both sources;

§ Coverage = observed cases/(observed cases + unobserved cases) %;

# Observed cases / Piemonte and Valle d'Aosta population for the corresponding year;

\*\* (Observed + unobserved cases)/ Piemonte and Valle d'Aosta population for the corresponding year.
